# Supplementary material
Source: PubMed Central journal article supplement (PMC4362266)
Supplement: JCI76327sd.pdf [file JCI76327sd.pdf]

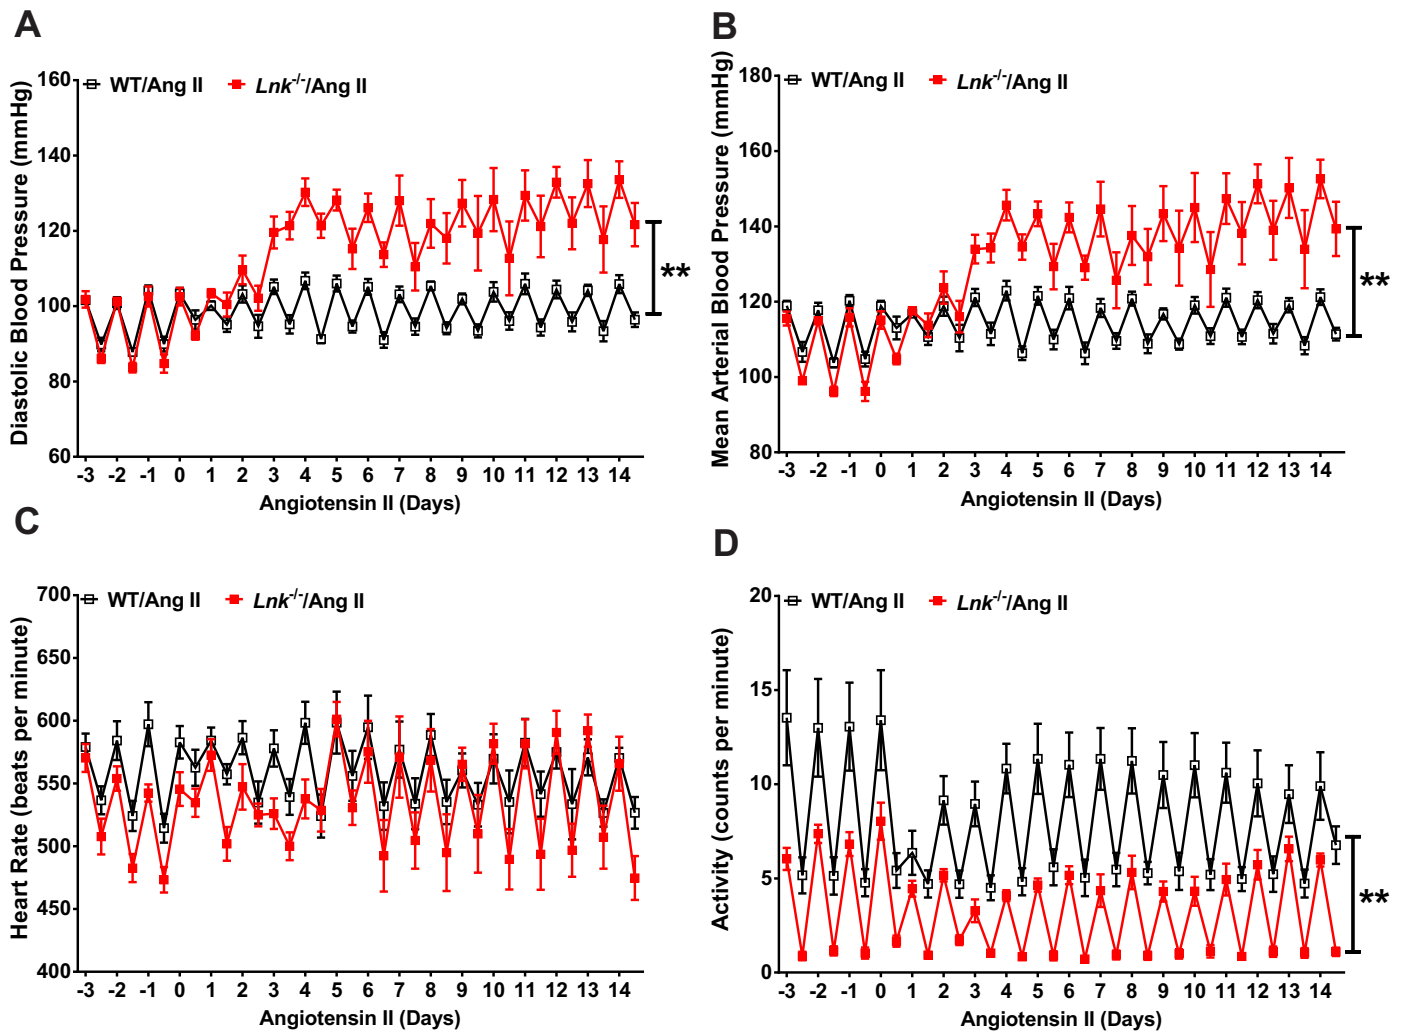

**Supplemental Figure 1. Loss of LNK exacerbates angiotensin II (Ang II)-induced hypertension and diminishes activity.** Telemetry recordings of A) diastolic blood pressure, B) mean arterial pressure, C) heart rate, and D) activity at baseline and during 14 days of Ang II infusion (140 ng/kg/min) in wild type (WT) and  $Lnk^{-/-}$  mice [n=5 per group]. Data are expressed as mean  $\pm$  SEM. Data were analyzed by ANOVA with repeated measures. \*\* $P < 0.01$  vs WT/Ang II.

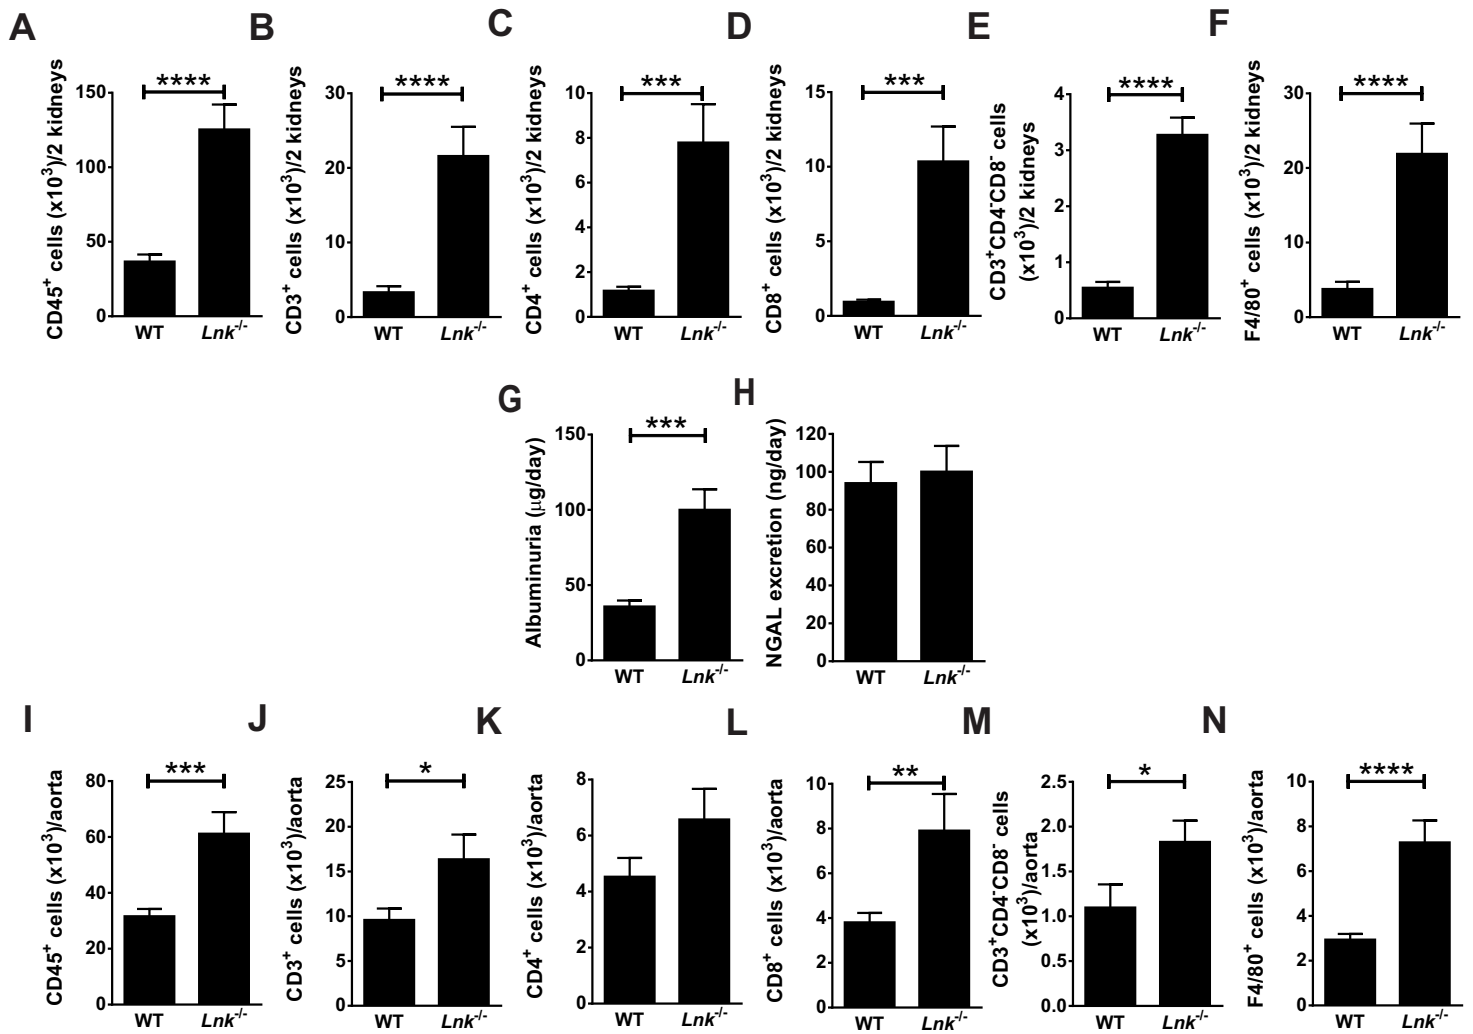

**Supplemental Figure 2. LNK Deficiency results in enhanced renal/vascular inflammation and glomerular injury in response to a normally suppressor dose of Ang II.** Summary data of absolute numbers of total leukocytes (CD45<sup>+</sup> cells), total T lymphocytes (CD45<sup>+</sup>CD3<sup>+</sup> cells), T cell subsets (CD4<sup>+</sup>, CD8<sup>+</sup>, and CD3<sup>+</sup>CD4<sup>+</sup>CD8<sup>-</sup> cells), and monocytes/macrophages (CD45<sup>+</sup>F4/80<sup>+</sup> cells) per 2 kidneys (A-F) or per thoracic aorta (I-N) in wild type (WT) and *Lnk*<sup>-/-</sup> mice infused with Ang II (140 ng/kg/min) for 2 weeks (n=7-10 per group). Glomerular filtration barrier injury was assessed by quantifying 24-hr urinary excretion of albumin (G), and renal tubular damage was evaluated by measuring 24-hr urinary excretion of neutrophil gelatinase-associated lipocalin (NGAL) (H) [n=6-7 per group]. Data were analyzed by Student's one-tailed *t*-test and are expressed as mean  $\pm$  SEM. \**P*<0.05, \*\**P*<0.01, \*\*\**P*<0.001, \*\*\*\**P*<0.0001 vs WT.

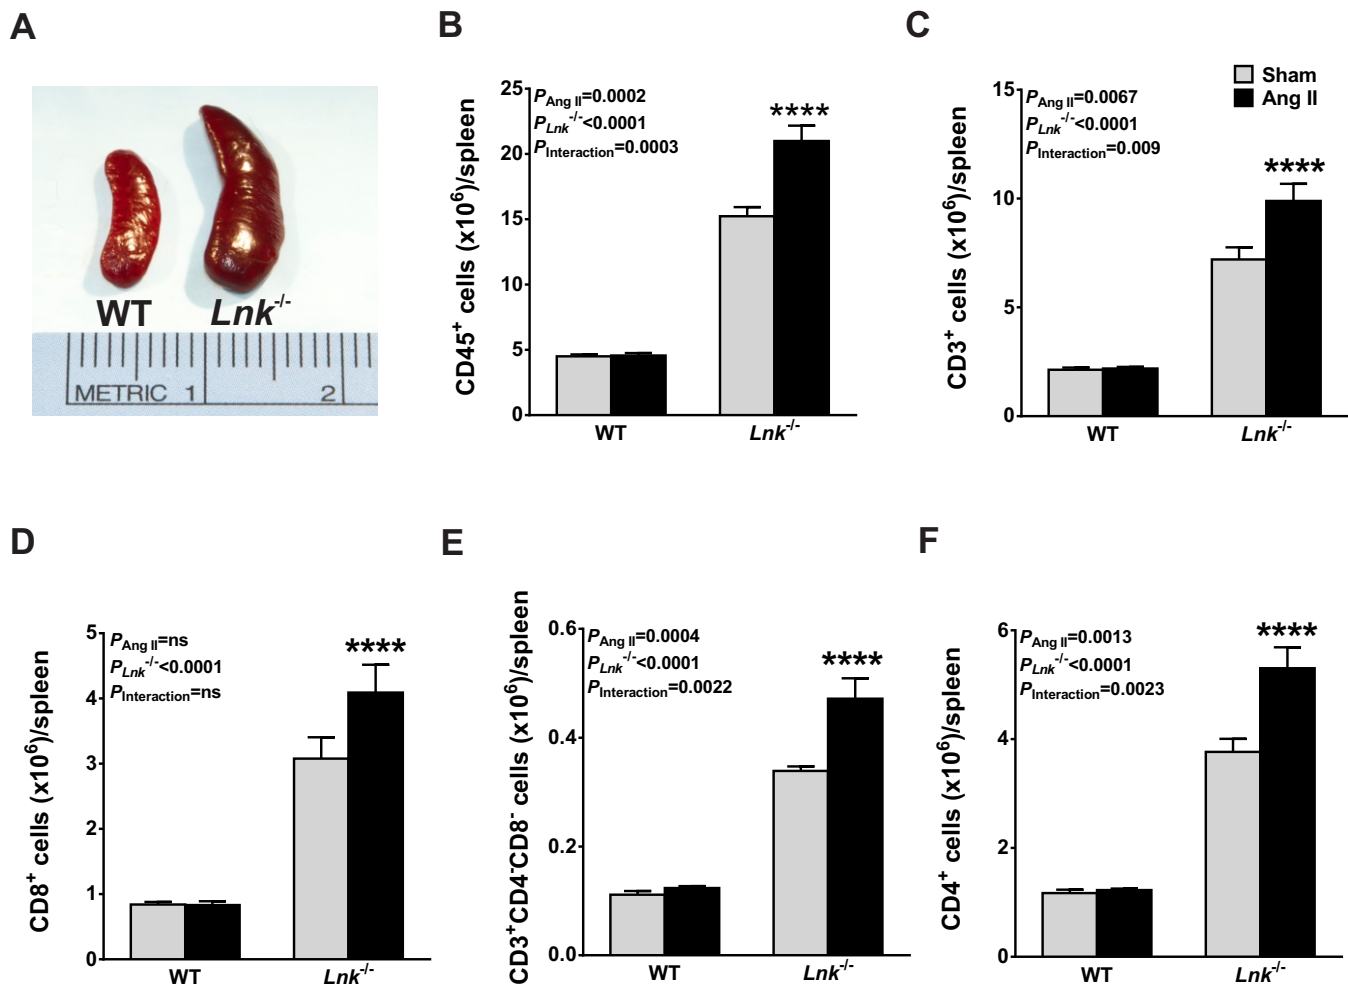

**Supplemental Figure 3. LNK deficiency results in increased numbers of total splenic leukocytes and T lymphocytes.** A) Representative image of a WT and *Lnk*<sup>-/-</sup> mouse spleen at baseline. B-F) Summary data of absolute numbers of total leukocytes (CD45<sup>+</sup> cells), total T lymphocytes (CD45<sup>+</sup>CD3<sup>+</sup> cells) and T cell subsets (CD4<sup>+</sup>, CD8<sup>+</sup>, and CD3<sup>+</sup>CD4<sup>-</sup>CD8<sup>-</sup> cells) per spleen in wild type (WT) and *Lnk*<sup>-/-</sup> mice infused with vehicle (Sham) or Ang II (490 ng/kg/min) for 2 weeks. Data are expressed as mean ± SEM (n=5-6 per group). *P* values for the effect of Ang II, the effect of LNK deficiency, and the interaction of Ang II and genotype as calculated by 2-way ANOVA are shown. \*\*\*\**P*<0.0001 vs WT/Ang II.

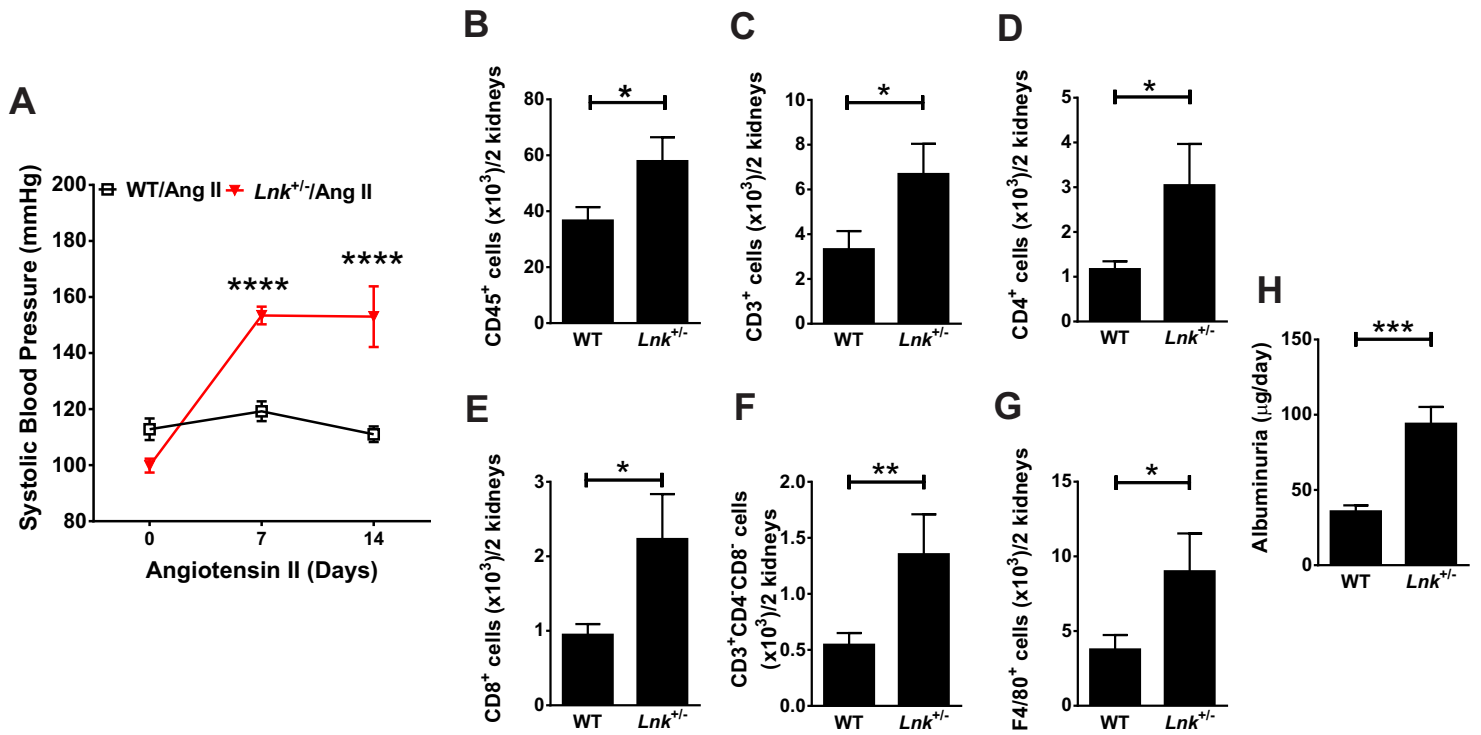

**Supplemental Figure 4. Loss of only one LNK allele results in elevated blood pressure, renal inflammation, and albuminuria in response to a normally suppressor dose of Ang II.** A) Non-invasive systolic blood pressure measurements recorded via the tail-cuff method at baseline and weekly after infusion of Ang II (140 ng/kg/min) in wild type (WT) and heterozygous  $Lnk^{+/-}$  mice (n=6-10 per group). B-G) Summary data of absolute numbers of total leukocytes (CD45<sup>+</sup> cells), total T lymphocytes (CD45<sup>+</sup>CD3<sup>+</sup> cells), T cell subsets (CD4<sup>+</sup>, CD8<sup>+</sup>, and CD3<sup>+</sup>CD4<sup>+</sup>CD8<sup>+</sup> cells), and monocytes/macrophages (CD45<sup>+</sup>F4/80<sup>+</sup> cells) per 2 kidneys (n=6-10 per group). H) 24-hr urinary excretion of albumin (n=6-7 per group). Data are expressed as mean  $\pm$  SEM. Blood pressure data were analyzed by ANOVA with repeated measures. All other data were analyzed by Student's one-tailed *t*-test. \**P*<0.05, \*\**P*<0.01, \*\*\**P*<0.001, \*\*\*\**P*<0.0001 vs WT.
